# Supplementary material for: Topological transformations in metal–organic frameworks: a prospective design route?
Source: Royal Society of Chemistry journal article supplement (doi:10.1039/d2ce00264g), 2022-01-01
Supplement: d2ce00264g1.pdf [file d2ce00264g1.pdf]

# Topological transformations in metal-organic frameworks: a prospective design route?

Eugeny V. Alexandrov<sup>1,2\*</sup>, Yumin Yang<sup>3</sup>, Lili Liang<sup>3</sup>, Junjie Wang<sup>3\*</sup>, Vladislav A. Blatov<sup>1,3\*</sup>

1. Samara Center for Theoretical Materials Science (SCTMS), Samara State Technical University, Molodogvardeyskaya St. 244, Samara, 443100, Russia.

2. Samara Branch of P.N. Lebedev Physical Institute of the Russian Academy of Science, Novo-Sadovaya St. 221, Samara 443011, Russian Federation.

3. State Key Laboratory of Solidification Processing, Northwestern Polytechnical University, Xi'an, Shaanxi 710072, People's Republic of China.

Email: [aleksandrov\\_ev1@mail.ru](mailto:aleksandrov_ev1@mail.ru), [wang.junjie@nwpu.edu.cn](mailto:wang.junjie@nwpu.edu.cn), [blatov@topospro.com](mailto:blatov@topospro.com)

## Supplementary information

**Table S1. Examples of structural transformations with the change of internal coordinates, pores dimensions, and placement of structural groups interacting through H-bonds and van der Waals contacts**

| Compound                                                                                                                                        | Net               | Component undergoing change                                                 | Stimuli                        | Changing property                                                | Ref.            |
|-------------------------------------------------------------------------------------------------------------------------------------------------|-------------------|-----------------------------------------------------------------------------|--------------------------------|------------------------------------------------------------------|-----------------|
| Co(N(CN) <sub>2</sub> ) <sub>2</sub>                                                                                                            | 3D <b>rtl</b>     | Rotation of coordination polyhedra                                          | Pressure                       | Negative linear compressibility, magnetic response               | <sup>1</sup>    |
| MIL-68(In)                                                                                                                                      | 3D 4,4,6,6T1      | Rotation of coordination polyhedra, H-bonds, pores                          | Gas pressure,                  | CO <sub>2</sub> adsorption                                       | <sup>2</sup>    |
| [Fe <sup>II</sup> Pd(CN) <sub>4</sub> (thiome) <sub>2</sub> ].2H <sub>2</sub> O                                                                 | <b>sql</b>        | Ligand rotation, H-bonds, pores                                             | Pressure, temperature, solvent | High-spin- to low-spin transition                                | <sup>3</sup>    |
| [Ni(L-aspartate)(H <sub>2</sub> O) <sub>2</sub> ].H <sub>2</sub> O                                                                              | 2C1               | Rotation of coordination polyhedra, H-bonds                                 | Pressure                       | Anisotropic compression                                          | <sup>4</sup>    |
| PCN-167                                                                                                                                         | 3D <b>stp</b>     | Bending of ligand                                                           | Temperature, solvent           | Stability, dyes uptake                                           | <sup>5</sup>    |
| PCN-168                                                                                                                                         | 3D <b>stp</b>     | Rotation of coordination polyhedra, bending of ligand                       | Temperature, solvent           | Stability, Anion exchange-based selective uptake of organic dyes | <sup>5</sup>    |
| [Co(NCS) <sub>2</sub> (tpomm)].2H <sub>2</sub> O·CH <sub>3</sub> OH                                                                             | 2-f 3D <b>pts</b> | Distortion of coordination polyhedra, ligand conformation, collapsing pores | Solvents, vapors               | Solvatochromic and vapochromic behavior, magnetic response       | <sup>6</sup>    |
| PCN-250 or MIL-127                                                                                                                              | 3D <b>soc</b>     | Distortion of coordination polyhedra, ligand conformation, pores            | Pressure                       | CH <sub>4</sub> adsorption                                       | <sup>7</sup>    |
| X-pcu-1-Zn-3i-α to X-pcu-1-Zn-3i-β to X-pcu-1-Zn-3i-γ                                                                                           | 3-f 3D <b>pcu</b> | Distortion of coordination polyhedra, ligand conformation, pores            | Temperature, vacuum, solvent   | Free volume                                                      | <sup>8</sup>    |
| X-pcu-1-Zn-3i-α to X-pcu-1-Zn-3i-δ                                                                                                              | 3-f 3D <b>pcu</b> | Networks slip, pores                                                        | Temperature, solvent           | Free volume                                                      | <sup>8</sup>    |
| Zn(CN) <sub>2</sub> ( <i>Pn</i> 3̄m) to Zn(CN) <sub>2</sub> -II ( <i>Pbca</i> )                                                                 | 2-f 3D <b>dia</b> | Rotation of coordination polyhedra, displacement of ligand                  | Pressure                       | -                                                                | <sup>9,10</sup> |
| [Co(4,4-pba) <sub>2</sub> ] <sub>4</sub> .3DMF.0.25EtOH.4H <sub>2</sub> O to [Co(4,4-pba) <sub>2</sub> ] <sub>2</sub> .2.5MeOH.H <sub>2</sub> O | 4-f 3D <b>dia</b> | Distortion of coordination polyhedra, ligand conformation, pores            | Solvent                        | Color                                                            | <sup>11</sup>   |
| α-Cu(tcm) to β-Cu(tcm)                                                                                                                          | 3-f 3D <b>ths</b> | Distortion of coordination polyhedra, ligand conformation, pores            | Temperature                    | Magnetic response                                                | <sup>12</sup>   |
| [Cd(2-eiba) <sub>2</sub> ](solvent)                                                                                                             | 4-f 3D <b>dia</b> | irreversible rotation of 2-eiba ligand                                      | Temperature, solvent           | Luminescent sensing of nitrobenzene and Fe <sup>3+</sup>         | <sup>13</sup>   |

MIL-68(In) – [In(OH)terephthalate]

thiome - 4-[(E)-2-(5-methyl-2-thienyl)vinyl]-1,2,4-triazole

PCN-167 - tris(μ-4,4',4''-(9,9'-spirobifluorene)-2,2',7,7'-tetrayl)tetrabenzoato)-bis(μ-oxo)-hexa-aqua-hexa-indium(iii) dinitrate

PCN-168 - tris(μ-4,4',4''-(9,9'-spirobifluorene)-2,2',7,7'-tetrayl)tetrabenzoato)-bis(μ-oxo)-hexa-aqua-hexa-iron(iii) dichloride

tpomm - tetrakis(4-pyridyloxymethylene)methane

PCN-250 or MIL-127 - catena-[hexakis(μ-5,5'-(E)-diazenediyl)bis(benzene-1,3-dicarboxylato))-tetrakis(μ-oxo)-dodeca-aqua-dodeca-iron]

X-pcu-1-Zn-3i-α to X-pcu-1-Zn-3i-β to X-pcu-1-Zn-3i-γ - [Zn2(4,4'-biphenyldicarboxylate)2(4,4'-bis(4-pyridyl)biphenyl)]

4,4-pba - 4-(4-pyridyl)benzoate

α-Cu(tcm), β-Cu(tcm) - copper(I) tricyanomethanide

Heiba - 4-(2-ethyl-1H-imidazol-1-yl)benzoic acid

**Table S2. Examples of structural transformations with the change of coordination modes of ligands and/or metal cations**

| Compound                                                          | Net1    | Net2    | Component undergoing change                                       | Stimuli              | Properties   | Ref.          |
|-------------------------------------------------------------------|---------|---------|-------------------------------------------------------------------|----------------------|--------------|---------------|
| [Cd(tpbda)(NO <sub>3</sub> ) <sub>2</sub> ].DMF.4H <sub>2</sub> O | 4-f pts | 4-f pts | Coordination mode of nitrate-anion, orientation of ligands, pores | Solvent              | Luminescence | <sup>14</sup> |
| X-pcu-1-Zn-3i- $\alpha$ to X-pcu-2-Zn-3i                          | 3-f pcu | 3-f pcu | square coordination of Zn(II) transform to tetrahedral            | Temperature, solvent | Free volume  | <sup>8</sup>  |

tpbda - N<sup>1</sup>,N<sup>1</sup>,N<sup>4</sup>,N<sup>4</sup>-tetrakis[4-(pyridin-4-yl)phenyl]benzene-1,4-diamine

X-pcu-1-Zn-3i- $\alpha$ , X-pcu-2-Zn-3i - [Zn<sub>2</sub>(4,4'-biphenyldicarboxylate)<sub>2</sub>(4,4'-bis(4-pyridyl)biphenyl)]

**Table S3. Examples of structural transformations with the change of bonds inside of ligand**

| Compound                                                                 | Net1          | Net2          | Component undergoing change                                      | Stimuli           | Properties                              | Ref.          |
|--------------------------------------------------------------------------|---------------|---------------|------------------------------------------------------------------|-------------------|-----------------------------------------|---------------|
| [Zn <sub>2</sub> (hfcpbtdp)(odb)] to [Zn <sub>2</sub> (dehfhbtbdp)(odb)] | 3D fsx-3,4-C2 | 3D 3,4,4,5T65 | cyclization of ligand, formation of one coordination bond, pores | UV and vis. light | UV-vis spectra, CO <sub>2</sub> capture | <sup>15</sup> |

hfcpbtdp - 4,4'-[(3,3,4,4,5,5-hexafluorocyclopent-1-ene-1,2-diyl)bis(5-ethylthiene-4,2-diyl)]dipyridine

dehfhbtbdp - 4,4'-(9a,9b-diethyl-4,4,5,5,6,6-hexafluoro-5,6,9a,9b-tetrahydro-4H-indeno[5,4-b:6,7-b']bisthiene-2,8-diyl)dipyridine

odb - 4,4'-oxydibenzoate

**Table S4. Examples of structural transformations with the change of network connectivity**

| Composition                                                                                                                                                                           | Net 1          | Net 2       | Component undergoing change                                                                              | Stimuli                 | Properties                                                     | Ref.          |
|---------------------------------------------------------------------------------------------------------------------------------------------------------------------------------------|----------------|-------------|----------------------------------------------------------------------------------------------------------|-------------------------|----------------------------------------------------------------|---------------|
| [Zn <sub>3</sub> (TBIB) <sub>2</sub> Cl <sub>6</sub> ].11H <sub>2</sub> O to [Zn <sub>3</sub> (TBIB) <sub>2</sub> Cl <sub>6</sub> ].6H <sub>2</sub> O                                 | 1D             | 2D hcb      | Zn-N bonds, conformation of ligand                                                                       | Solvent                 | Proton conductivity                                            | <sup>16</sup> |
| [Zn <sub>2</sub> ( $\mu_4$ -mtbpc)(DMF) <sub>4</sub> ].DMF.4H <sub>2</sub> O to [Zn <sub>2</sub> ( $\mu_4$ -mtbpc)(DMF) <sub>4</sub> ].Xsolv                                          | 2D 2,4L2 (sql) | 3D 4-f dia  | Dimerization of metals, pores                                                                            | Solvent                 | H <sub>2</sub> adsorption                                      | <sup>17</sup> |
| [Ag(pptap)(NO <sub>2</sub> )](CHCl <sub>3</sub> ), [Ag(pptap)](NO <sub>2</sub> )(H <sub>2</sub> O) <sub>2.25</sub> to [Ag(pptap)](CF <sub>3</sub> CO <sub>2</sub> )(H <sub>2</sub> O) | 1D (4,4)(0,2)  | 3D sra      | 4-Py group replaces NO <sub>2</sub> <sup>-</sup> group in coordination sphere of Ag <sup>+</sup> , pores | Solvent, vapor, anion   | Cr <sub>2</sub> O <sub>7</sub> <sup>2-</sup> capture           | <sup>18</sup> |
| AlTz-53 to AlTz-68                                                                                                                                                                    | bpq            | 4,4,6,6T1   | Coordination bonds rearrangement through defective structures                                            | Solvent                 | Free volume, enzyme immobilization, catalytic ester hydrolysis | <sup>19</sup> |
| [H <sub>2</sub> tmen][Er(HCOO) <sub>4</sub> ] <sub>2</sub>                                                                                                                            | vmd            | vmt         | Coordination bonds rearrangement, linkage of Er <sup>3+</sup>                                            | Pressure                | Luminescence                                                   | <sup>20</sup> |
| Cu(TCNQ)-I to Cu(TCNQ)-II                                                                                                                                                             | 2-f dmh        | 2-f ffi     | Coordination bonds rearrangement                                                                         | Solvent, electric field | Magnetic response, charge-transport                            | <sup>21</sup> |
| [ZnCl <sub>2</sub> ( $\mu$ -bipy)] to [Zn( $\mu$ -Cl) <sub>2</sub> ( $\mu$ -bipy)]                                                                                                    | 1D 2C1         | 2D sql      | Coordination bonds rearrangement, linkage of Zn <sup>2+</sup>                                            | Low temperature         | -                                                              | <sup>22</sup> |
| Cd(abdc)(bpy).4.5H <sub>2</sub> O.3DMF (P6/m) to Cd(abdc)(bpy).4H <sub>2</sub> O.2.5DMF (Pbam)                                                                                        | kag            | pcu         | Coordination bonds rearrangement                                                                         | Solvent, pressure       | Luminescence, dye separation                                   | <sup>23</sup> |
| UPC-601 to UPC-602                                                                                                                                                                    | 3D fit         | 3D 5,6,11T4 | Rearrangement of 1D SBU to 2D SBU                                                                        | Temperature             | Gas adsorption                                                 | <sup>24</sup> |

TBIB - 1,3,5-tri(1H-benzo[d]imidazol-1-yl)benzene

mtbpc - methanetetrakis(biphenyl-4'-carboxylate)

pptap - (5-(pyridin-3-yl)-4-(pyridin-4-yl)-4H-1,2,4-triazol-3-yl)pyridine

AlTz-53, AlTz-68 - [Al(OH)(TzDB)] (TzDB = 4,4'-(1,2,4,5-tetrazine-3,6-diyl)dibenzoate)

H<sub>2</sub>tmen<sup>2+</sup> - N,N,N',N'-tetramethylethylenediammonium

TCNQ - 5,7,8,8-tetracyanoquinodimethane

abdc - 2-amino-1,4-benzenedicarboxylate

UPC-601, UPC-602 - [Ba<sub>2</sub>(BIPA-TC)(DMF)(H<sub>2</sub>O)].H<sub>2</sub>O (H<sub>4</sub>BIPA-TC = 5,5'-(1,3,6,8-tetraoxobenzo[Imn][3,8] phenanthroline-2-7-diyl)bis-1,3-benzenedicarboxylic acid)

**Table S5. Examples of structural transformations with the change of entanglement pattern**

| Compound                                                                                                                                                                                                                     | Net 1           | Net 2            | Component undergoing change                                                                                          | Stimuli                                       | Properties                                               | Ref. |
|------------------------------------------------------------------------------------------------------------------------------------------------------------------------------------------------------------------------------|-----------------|------------------|----------------------------------------------------------------------------------------------------------------------|-----------------------------------------------|----------------------------------------------------------|------|
| [Ni(HBTC)(bipy)]                                                                                                                                                                                                             | 3D hms          | 2-f 3D hms-c     | Coordination bonds rearrangement, rotation and translation of pillars and layers, pores                              | Temperature                                   | N <sub>2</sub> sorption, removal linkers                 | 25   |
| [Ni(HBTC)(bipy)]                                                                                                                                                                                                             | 3D gra          | 2-f 3D hms-c     | Coordination bonds rearrangement, rotation and translation of pillars and layers, pores                              | Temperature                                   | N <sub>2</sub> sorption, removal linkers                 | 25   |
| [Ni(hatco)] <sub>3</sub> [(Ni(hatco)(H <sub>2</sub> O) <sub>2</sub> ][(Ni(hatco)(TATAB) <sub>2</sub> )] <sub>2</sub> ·46H <sub>2</sub> O to [(Ni(hatco)(TATAB) <sub>2</sub> )] <sub>3</sub> ·5DMF                            | 0D              | 2D hcb Borromean | Coordination bonds rearrangement, coordination environment of metal                                                  | Solvents                                      | Free volume                                              | 26   |
| [Ba <sub>2</sub> (H <sub>2</sub> O) <sub>2</sub> (BIPATC)(DMF)(H <sub>2</sub> O)]·DMF·H <sub>2</sub> O (UPC-600) to [Ba(BIPA-TC) <sub>0.5</sub> (H <sub>2</sub> O) <sub>2</sub> ·3H <sub>2</sub> O (UPC-601)]                | 2-f 3D 6,8T1562 | 3D fit           | Rearrangement of 1D SBUs                                                                                             | Temperature                                   | Gas adsorption                                           | 24   |
| X-pcu-1-Zn-3i-β to X-pcu-1-Zn-4i                                                                                                                                                                                             | 3-f 3D pcu      | 4-f 3D pcu       | Coordination bonds rearrangement, degree of interpenetration, pores                                                  | Temperature                                   | Free volume                                              | 8    |
| Zn(CN) <sub>2</sub>                                                                                                                                                                                                          | 2-f 3D dia      | 3D dia           | Coordination bonds rearrangement, degree of interpenetration, pores                                                  | Pressure, solvent                             | Free volume                                              | 9,10 |
| Zn(CN) <sub>2</sub>                                                                                                                                                                                                          | 2-f 3D dia      | 3D lon           | Coordination bonds rearrangement, degree of interpenetration, network topology, pores                                | Pressure, solvent                             | Free volume                                              | 9,10 |
| Zn(CN) <sub>2</sub>                                                                                                                                                                                                          | 2-f 3D dia      | 3D pyr           | Coordination bonds rearrangement, degree of interpenetration, network topology, pores                                | Pressure, solvent                             | Free volume                                              | 9,10 |
| Zn(CN) <sub>2</sub>                                                                                                                                                                                                          | 3D lon          | 3D pyr           | Coordination bonds rearrangement, degree of interpenetration, network topology, pores                                | Pressure, solvent                             | Free volume                                              | 9,10 |
| [Co(4,4-pba) <sub>2</sub> ](MeOH) <sub>2.5</sub> (H <sub>2</sub> O) to [Co(4,4-pba) <sub>2</sub> (MeOH) <sub>2</sub> ](MeOH) <sub>2.5</sub> (H <sub>2</sub> O) <sub>2</sub>                                                  | 4-f 3D dia      | 2-f 3D pts       | Coordination bonds rearrangement, coordination modes of ligands, degree of interpenetration, network topology, pores | Solvent                                       | Color                                                    | 11   |
| [Co(4,4-pba) <sub>2</sub> (MeOH) <sub>2</sub> ](MeOH) <sub>2.5</sub> (H <sub>2</sub> O) <sub>2</sub> to [Co(4,4-pba) <sub>2</sub> (MeOH) <sub>2</sub> ](MeOH) <sub>0.5</sub> (H <sub>2</sub> O) <sub>0.5</sub>               | 2-f 3D pts      | 3-f 3D qtz       | Coordination bonds rearrangement, coordination modes of ligands, degree of interpenetration, network topology, pores | Solvent                                       | Color                                                    | 11   |
| [Co(4,4-pba) <sub>2</sub> (MeOH) <sub>2</sub> ](MeOH) <sub>0.5</sub> (H <sub>2</sub> O) <sub>0.5</sub> to [Co(4,4-pba) <sub>2</sub> ] <sub>4</sub> (DMF) <sub>3</sub> (EtOH) <sub>0.25</sub> (H <sub>2</sub> O) <sub>4</sub> | 3-f 3D qtz      | 4-f 3D dia       | Coordination bonds rearrangement, coordination modes of ligands, degree of interpenetration, network topology, pores | Solvent                                       | Color                                                    | 11   |
| α-MUF-9 to β-MUF-9                                                                                                                                                                                                           | 3D pcu          | 2-f 3D pcu       | Coordination bonds rearrangement, degree of interpenetration, pores                                                  | Temperature, desolvation, mechanical shearing | Mechanical response, dyes adsorption                     | 27   |
| α-MUF-10 to β-MUF-10 (enantiopure R-H <sub>2</sub> L or S-H <sub>2</sub> L)                                                                                                                                                  | 3D pcu          | 2-f 3D pcu       | Coordination bonds rearrangement, degree of interpenetration, pores                                                  | Temperature, desolvation, mechanical shearing | Mechanical response, dyes adsorption                     | 27   |
| [Zn <sub>2</sub> (ndc) <sub>2</sub> (bpy)]                                                                                                                                                                                   | 2-f 3D pcu      | 3-f 3D pcu       | Coordination bonds rearrangement, degree of interpenetration, pores                                                  | Desolvation                                   | Free volume                                              | 28   |
| [Co <sub>2</sub> (ndc) <sub>2</sub> (bpy)]                                                                                                                                                                                   | 2-f 3D pcu      | 3-f 3D pcu       | Coordination bonds rearrangement, degree of interpenetration, pores                                                  | Desolvation                                   | Free volume                                              | 29   |
| [Zn(pvb) <sub>2</sub> ]-DMF - [Zn(pvb) <sub>2</sub> ]                                                                                                                                                                        | 7-f 3D dia      | 8-f 3D dia       | Coordination bonds rearrangement, degree of interpenetration, pores                                                  | Desolvation                                   | Second harmonic generation, pores                        | 30   |
| [Cd(2-eiba) <sub>2</sub> ](solvent)                                                                                                                                                                                          | 4-f 3D dia      | 5-f 3D dia       | Coordination bonds rearrangement, degree of interpenetration, pores                                                  | Temperature, solvent                          | Luminescent sensing of nitrobenzene and Fe <sup>3+</sup> | 13   |

HBTC - singly protonated 1,3,5-benzene tricarboxylate

hatco - 1,3,6,9,11,14-hexaazatricyclo[12.2.1.16,9]octadecane

H<sub>3</sub>TATAB - 4,4',4"-triazine-1,3,5-triyltriaminobenzoic acid

H<sub>4</sub>BIPA-TC - 5,5'-(1,3,6,8-tetraoxobenzo[Imn][3,8] phenanthroline-2-7-diyl)bis-1,3-benzenedicarboxylic acid

X-pcu-1-Zn-3i-β to X-pcu-1-Zn-4i - [Zn<sub>2</sub>(4,4'-biphenyldicarboxylate)<sub>2</sub>(4,4'-bis(4-pyridyl)biphenyl)]

4,4-pba - 4-(4-pyridyl)benzoate

α-MUF-9, β-MUF-9 - [Zn<sub>4</sub>O(rac-L)<sub>3</sub>] (L<sup>2-</sup> = 6,7-bis(4-methylphenyl)dibenzo[e,g][1,4]diazocine-3,10-dicarboxylate)

H<sub>2</sub>ndc - 2,6-naphthalene dicarboxylic acid

bpy - 4,4'-bipyridine

pvb - trans-2-(4-pyridyl)-4-vinylbenzoate

Heiba - 4-(2-ethyl-1H-imidazol-1-yl)benzoic acid

---

## References

- 1 A. A. Yakovenko, K. W. Chapman and G. J. Halder, *Acta Crystallographica Section B: Structural Science, Crystal Engineering and Materials*, 2015, **71**, 252–257.
- 2 Y. Hu, B. Lin, P. He, Y. Li, Y. Huang and Y. Song, *Chemistry - A European Journal*, 2015, **21**, 18739–18748.
- 3 N. F. Sciortino, F. Ragon, K. A. Zenere, P. D. Southon, G. J. Halder, K. W. Chapman, L. Piñeiro-López, J. A. Real, C. J. Kepert and S. M. Neville, *Inorganic Chemistry*, 2016, **55**, 10490–10498.
- 4 J. A. Gould, M. J. Rosseinsky, J. E. Warren and S. A. Moggach, *Zeitschrift für Kristallographie*, 2014, **229**, 123–128.
- 5 J. Pang, M. Wu, J.-S. Qin, C. Liu, C. T. Lollar, D. Yuan, M. Hong and H.-C. Zhou, *Chemistry of Materials*, 2019, **31**, 8787–8793.
- 6 P. Hu, L. Yin, A. Kirchon, J. Li, B. Li, Z. Wang, Z. Ouyang, T. Zhang and H. Zhou, *Inorganic Chemistry*, 2018, **57**, 7006–7014.
- 7 S. Yuan, X. Sun, J. Pang, C. Lollar, J.-S. Qin, Z. Perry, E. Joseph, X. Wang, Y. Fang, M. Bosch, D. Sun, D. Liu and H.-C. Zhou, *Joule*, 2017, **1**, 806–815.
- 8 M. Shivanna, Q.-Y. Yang, A. Bajpai, E. Patyk-Kazmierczak and M. J. Zaworotko, *Nature Communications*, 2018, **9**, 3080.
- 9 S. H. Lapidus, G. J. Halder, P. J. Chupas and K. W. Chapman, *Journal of the American Chemical Society*, 2013, **135**, 7621–7628.
- 10 F. Trousselet, A. Boutin and F. X. Coudert, *Chemistry of Materials*, 2015, **27**, 4422–4430.
- 11 G. Mehlana, G. Ramon and S. A. Bourne, *CrystEngComm*, 2013, **15**, 9521.
- 12 S. J. Hunt, M. J. Cliffe, J. A. Hill, A. B. Cairns, N. P. Funnell and A. L. Goodwin, *CrystEngComm*, 2015, **17**, 361–369.
- 13 M. Ming, Q. Chen and J. Chen, *Journal of Solid State Chemistry*, 2020, **285**, 121236.
- 14 J.-Q. Li, S.-W. Ke, T. Yan, Y.-Y. Li, Y. Zhou, M. Kurmoo, J. Su and J.-L. Zuo, *Inorganic Chemistry*, 2021, **60**, 8331–8338.
- 15 V. I. Nikolayenko, S. A. Herbert and L. J. Barbour, *Chemical Communications*, 2017, **53**, 11142–11145.
- 16 R. A. Agarwal, A. Das and S. Omar, *The Journal of Physical Chemistry C*, 2020, **124**, 18901–

---

18910.

- 17 L. Wen, P. Cheng and W. Lin, *Chemical Communications*, 2012, **48**, 2846.
- 18 C.-P. Li, H. Zhou, S. Wang, J. Chen, Z.-L. Wang and M. Du, *Chemical Communications*, 2017, **53**, 9206–9209.
- 19 S.-H. Lo, L. Feng, K. Tan, Z. Huang, S. Yuan, K.-Y. Wang, B.-H. Li, W.-L. Liu, G. S. Day, S. Tao, C.-C. Yang, T.-T. Luo, C.-H. Lin, S.-L. Wang, S. J. L. Billinge, K.-L. Lu, Y. J. Chabal, X. Zou and H.-C. Zhou, *Nature Chemistry*, 2020, **12**, 90–97.
- 20 E. C. Spencer, M. S. R. N. Kiran, W. Li, U. Ramamurty, N. L. Ross and A. K. Cheetham, *Angewandte Chemie - International Edition*, 2014, **53**, 5583–5586.
- 21 C. A. Fernandez, P. C. Martin, T. Schaef, M. E. Bowden, P. K. Thallapally, L. Dang, W. Xu, X. Chen and B. P. McGrail, *Scientific Reports*, 2015, **4**, 6114.
- 22 C. Hu and U. Englert, *Angewandte Chemie International Edition*, 2005, **44**, 2281–2283.
- 23 H. L. Jiang, Y. Tatsu, Z. H. Lu and Q. Xu, *Journal of the American Chemical Society*, 2010, **132**, 5586–5587.
- 24 F. Dai, X. Wang, Y. Wang, Z. Liu and D. Sun, *Angewandte Chemie International Edition*, 2020, **59**, 22372–22377.
- 25 S. Jeong, D. Kim, J. Park, S. Shin, H. Kim, G. H. Jeong, D. Moon, H. R. Moon and M. S. Lah, *Chemistry of Materials*, 2017, **29**, 3899–3907.
- 26 X. Jiang, Z. Li, Y. Zhai, G. Yan, H. Xia and Z. Li, *CrystEngComm*, 2014, **16**, 805–813.
- 27 A. Ferguson, L. Liu, S. J. Tapperwijn, D. Perl, F. X. Coudert, S. van Cleuvenbergen, T. Verbiest, M. A. van der Veen and S. G. Telfer, *Nature Chemistry*, 2016, **8**, 250–257.
- 28 H. Aggarwal, P. M. Bhatt, C. X. Bezuidenhout and L. J. Barbour, *Journal of the American Chemical Society*, 2014, **136**, 3776–3779.
- 29 H. Aggarwal, R. K. Das, P. M. Bhatt and L. J. Barbour, *Chemical Science*, 2015, **6**, 4986–4992.
- 30 Z. Chen, G. Gallo, V. A. Sawant, T. Zhang, M. Zhu, L. Liang, A. Chanthapally, G. Bolla, H. S. Quah, X. Liu, K. P. Loh, R. E. Dinnebier, Q. Xu and J. J. Vittal, *Angewandte Chemie International Edition*, 2020, **59**, 833–838.
